# Supplementary material for: Early diagnosis of oral cancer and lesions in Fanconi anemia patients: a prospective and longitudinal study using saliva and plasma
Source: bioRxiv or medRxiv preprint supplement (doi:10.1101/2023.01.03.22284070), 2023-01-05
Supplement: Supplementary file [file media-1.pdf]

**Supplementary Table 2.** OncoPrint™ Pan-Cancer Cell-Free Assay

| Hotspot genes |               |               | Tumor suppressor genes | CNV genes    | Gene fusions * |
|---------------|---------------|---------------|------------------------|--------------|----------------|
| <i>AKT1</i>   | <i>FGFR3</i>  | <i>MTOR</i>   | <i>APC</i>             | <i>CCND1</i> | <i>ALK</i>     |
| <i>ALK</i>    | <i>FGFR4</i>  | <i>NRAS</i>   | <i>FBXW7</i>           | <i>CCND2</i> | <i>BRAF</i>    |
| <i>AR</i>     | <i>FLT3</i>   | <i>NTRK1</i>  | <i>PTEN</i>            | <i>CCND3</i> | <i>ERG</i>     |
| <i>ARAF</i>   | <i>GNA11</i>  | <i>NTRK3</i>  | <i>TP53</i>            | <i>CDK4</i>  | <i>ETV1</i>    |
| <i>BRAF</i>   | <i>GNAQ</i>   | <i>PDGFRA</i> |                        | <i>CDK6</i>  | <i>FGFR1</i>   |
| <i>CHEK2</i>  | <i>GNAS</i>   | <i>PIK3CA</i> |                        | <i>EGFR</i>  | <i>FGFR2</i>   |
| <i>CTNNB1</i> | <i>HRAS</i>   | <i>RAF1</i>   |                        | <i>ERBB2</i> | <i>FGFR3</i>   |
| <i>DDR2</i>   | <i>IDH1</i>   | <i>RET</i>    |                        | <i>FGFR1</i> | <i>MET</i>     |
| <i>EGFR</i>   | <i>IDH2</i>   | <i>ROS1</i>   |                        | <i>FGFR2</i> | <i>NTRK1</i>   |
| <i>ERBB2</i>  | <i>KIT</i>    | <i>SF3B1</i>  |                        | <i>FGFR3</i> | <i>NTRK3</i>   |
| <i>ERBB3</i>  | <i>KRAS</i>   | <i>SMAD4</i>  |                        | <i>MET</i>   | <i>RET</i>     |
| <i>ESR1</i>   | <i>MAP2K1</i> | <i>SMO</i>    |                        | <i>MYC</i>   | <i>ROS1</i>    |
| <i>FGFR1</i>  | <i>MAP2K2</i> |               |                        |              |                |
| <i>FGFR2</i>  | <i>MET</i>    |               |                        |              |                |

- 52 genes
- Single library from DNA and RNA\*
- 272 amplicons
- >900 hotspots and indels
- Extended coverage of *TP53*
- 96 fusions
- 12 CNVs
- *MET* exon 14 skipping

\* RNA was not processed and gene fusions were not interrogated
