# Supplementary material for: Early diagnosis of oral cancer and lesions in Fanconi anemia patients: a prospective and longitudinal study using saliva and plasma
Source: bioRxiv or medRxiv preprint supplement (doi:10.1101/2023.01.03.22284070), 2023-01-05
Supplement: Supplementary file [file media-2.pdf]

**Supplementary Table 3.** Sequencing performance per liquid biopsy sample in FA patients.

| patient | collection time (per patient) | sample type | ng DNA in sample | median molecular coverage <sup>1</sup> | LOD (%) <sup>2</sup> | mapped reads <sup>3</sup> | on target reads (%) <sup>3</sup> |
|---------|-------------------------------|-------------|------------------|----------------------------------------|----------------------|---------------------------|----------------------------------|
| FA029   | 1                             | plasma      | 16.0             | 1508                                   | 0.2835               | 23,252,734                | 94.5                             |
| FA029   | 1                             | saliva      | 16,500           | 11345                                  | 0.0767               | 24,820,351                | 96.36                            |
| FA029   | 3                             | plasma      | 21.5             | 1827                                   | 0.2341               | 11,629,004                | 93.31                            |
| FA029   | 3                             | saliva      | 65,250           | 7718                                   | 0.077                | 17,646,973                | 96.44                            |
| FA049   | 1                             | plasma      | 18.0             | 970                                    | 0.4404               | 9,691,979                 | 93.4                             |
| FA049   | 1                             | saliva      | 71,250           | 6143                                   | 0.0771               | 16,753,934                | 97.47                            |
| FA049   | 2                             | plasma      | 10.6             | 1274                                   | 0.3356               | na                        | na                               |
| FA049   | 2                             | saliva      | 6,213            | 6107                                   | 0.0771               | na                        | na                               |
| FA049   | 3                             | saliva      | 1,658            | 5863                                   | 0.0771               | 13,204,407                | 92.92                            |
| FA082   | 2                             | plasma      | 17.7             | 1806                                   | 0.2368               | na                        | na                               |
| FA082   | 2                             | saliva      | 3,025            | 7576                                   | 0.077                | na                        | na                               |
| FA082   | 4                             | plasma      | 31.8             | 1103                                   | 0.3876               | 14,061,179                | 91.42                            |
| FA082   | 4                             | saliva      | 26,500           | 7839                                   | 0.077                | 17,869,458                | 96.15                            |
| FA103   | 1                             | plasma      | 27.8             | 908                                    | 0.4704               | 10,700,829                | 94.19                            |
| FA103   | 1                             | saliva      | 35,625           | 8525                                   | 0.077                | 23,583,046                | 97.29                            |
| FA103   | 2                             | plasma      | 29.5             | 3915                                   | 0.1093               | 16,066,352                | 94.97                            |
| FA103   | 2                             | saliva      | 12,500           | 11106                                  | 0.0768               | 22,415,353                | 97.12                            |
| FA103   | 3                             | saliva      | 12,200           | 6576                                   | 0.0771               | 24,088,967                | 96.99                            |
| FA122   | 1                             | plasma      | 37.1             | 3787                                   | 0.1129               | 10,544,807                | 92.24                            |
| FA122   | 1                             | saliva      | 24,125           | 7298                                   | 0.077                | 13,981,295                | 95.81                            |
| FA145   | 1                             | plasma      | 26.5             | 3024                                   | 0.1414               | 10,997,167                | 93.31                            |
| FA145   | 1                             | saliva      | 34,750           | 5365                                   | 0.0797               | 10,815,243                | 97.22                            |
| FA145   | 2                             | plasma      | 33.6             | 3334                                   | 0.1283               | na                        | na                               |
| FA145   | 2                             | saliva      | 11,900           | 5804                                   | 0.0771               | 23,564,390                | 96.84                            |
| FA145   | 3                             | saliva      | 6,975            | 5339                                   | 0.0801               | 11,088,276                | 94.8                             |
| FA145   | 4                             | saliva      | 23,125           | 4713                                   | 0.0908               | 10,415,095                | 94.13                            |
| FA145   | 4                             | leucocytes  | 432              | 3207                                   | 0.1334               | 12,641,714                | 93.77                            |
| FA228   | 1                             | plasma      | 19.6             | 940                                    | 0.4545               | 13,408,865                | 93.16                            |
| FA228   | 1                             | saliva      | 27,250           | 12623                                  | 0.0767               | 25,928,587                | 97.41                            |
| FA228   | 2                             | saliva      | 140,000          | 5836                                   | 0.0771               | na                        | na                               |
| FA228   | 2                             | plasma      | 9.4              | 957                                    | 0.4466               | na                        | na                               |
| FA228   | 3                             | leucocytes  | 246.6            | 4085                                   | 0.1047               | 18,923,515                | 95.63                            |
| FA228   | 3                             | plasma      | 10.7             | 1011                                   | 0.4228               | na                        | na                               |
| FA228   | 3                             | saliva      | 64,370           | 7992                                   | 0.077                | na                        | na                               |
| FA228   | 4                             | plasma      | 13.9             | 1622                                   | 0.2635               | na                        | na                               |
| FA228   | 5                             | saliva      | 52,250           | 7830                                   | 0.077                | 19,684,271                | 96.84                            |
| FA294   | 1                             | plasma      | 10.4             | 633                                    | 0.6748               | 9,188,463                 | 93.78                            |
| FA294   | 1                             | saliva      | 4,500            | 8605                                   | 0.077                | 26,520,004                | 97.15                            |
| FA328   | 1                             | saliva      | 7,417            | 4290                                   | 0.0997               | 12,232,402                | 97.48                            |
| FA328   | 1                             | plasma      | 13.5             | 863                                    | 0.4952               | 16,046,003                | 93.33                            |
| FA328   | 3                             | saliva      | 1,542            | 4647                                   | 0.092                | 18,446,600                | 96.01                            |
| FA374   | 1                             | saliva      | 20,375           | 6105                                   | 0.0771               | 26,463,807                | 97.7                             |
| FA374   | 2                             | saliva      | 6,850            | 13376                                  | 0.0766               | na                        | na                               |
| FA374   | 3                             | plasma      | 13.6             | 650                                    | 0.6567               | 9,478,134                 | 94.7                             |
| FA374   | 3                             | saliva      | 6,875            | 11185                                  | 0.0768               | 30,112,655                | 97.21                            |
| FA374   | 4                             | saliva      | 34,250           | 7154                                   | 0.077                | 19,425,740                | 96.77                            |
| FA452   | 1                             | saliva      | 4,917            | 4637                                   | 0.0922               | 20,406,290                | 97.72                            |
| FA452   | 2                             | saliva      | 12,500           | 3681                                   | 0.1162               | 17,321,375                | 95.86                            |
| FA452   | 2                             | plasma      | 11.7             | 548                                    | 0.7785               | 7,081,164                 | 93.4                             |
| FA452   | 3                             | saliva      | 13,375           | 6097                                   | 0.0771               | 12,785,876                | 94                               |
| FA452   | 3                             | plasma      | 43.8             | 4324                                   | 0.0989               | 17,938,349                | 92.88                            |
| FA467   | 1                             | leucocytes  | 714              | 3729                                   | 0.1147               | 19,272,522                | 95.61                            |
| FA467   | 1                             | plasma      | 16.4             | 1859                                   | 0.23                 | na                        | na                               |
| FA467   | 1                             | saliva      | 16,375           | 7868                                   | 0.077                | na                        | na                               |
| FA531   | 2                             | saliva      | 12,225           | 5072                                   | 0.0843               | 10,889,921                | 92.08                            |
| FA531   | 3                             | saliva      | 11,775           | 3053                                   | 0.1401               | 13,829,778                | 94.58                            |
| FA531   | 3                             | plasma      | 10.7             | 1311                                   | 0.3261               | 16,004,566                | 92.79                            |
| FA531   | 4                             | saliva      | 63,500           | 4103                                   | 0.1042               | 12,653,106                | 95.91                            |
| FA531   | 4                             | leucocytes  | 285              | 4520                                   | 0.0946               | 15,931,260                | 94.21                            |
| FA536   | 1                             | saliva      | 13,620           | 7096                                   | 0.0771               | 36,225,694                | 97.47                            |
| FA536   | 1                             | plasma      | 20.0             | 1079                                   | 0.396                | 12,515,086                | 92.76                            |
| FA536   | 2                             | plasma      | 15.5             | 1784                                   | 0.2396               | na                        | na                               |
| FA536   | 2                             | saliva      | 4,875            | 10496                                  | 0.0769               | na                        | na                               |
| FA536   | 3                             | saliva      | 6,325            | 9233                                   | 0.0769               | 36,319,049                | 96.87                            |
| FA536   | 4                             | saliva      | 7,925            | 14727                                  | 0.0765               | 31,401,604                | 97.04                            |
| FA746   | 1                             | saliva      | 788              | 2026                                   | 0.2111               | 13,898,152                | 95.23                            |
| FA746   | 2                             | saliva      | 3,825            | 6096                                   | 0.0771               | 30,577,592                | 96.99                            |
| FA746   | 2                             | plasma      | 285.0            | 3247                                   | 0.1317               | 23,542,906                | 95.81                            |
| FA829   | 1                             | saliva      | 55,000           | 10159                                  | 0.077                | na                        | na                               |
| FA829   | 2                             | saliva      | 91,250           | 9842                                   | 0.077                | 29,544,169                | 96.8                             |

<sup>1</sup> Median molecular coverage reports median number of individual interrogated DNA molecules across targets.

<sup>2</sup> LOD: limit of detection (median value across all targets)

<sup>3</sup> na: values that could not be retrieved
