# Supplementary material for: Early diagnosis of oral cancer and lesions in Fanconi anemia patients: a prospective and longitudinal study using saliva and plasma
Source: bioRxiv or medRxiv preprint supplement (doi:10.1101/2023.01.03.22284070), 2023-01-05
Supplement: Supplementary file [file media-3.pdf]

**Supplementary Table 4.** Non-synonymous small variants or mutations (SNVs, MNVs and INDELS) found in LBs and leukocytes

| patient | collection time (per patient) | cancer gene | AA change      | MAF (%) <sup>1</sup> | saliva | plasma | leukocytes <sup>2</sup> |
|---------|-------------------------------|-------------|----------------|----------------------|--------|--------|-------------------------|
| FA082   | 4                             | TP53        | p.E180GfsTer67 | 0.1907               |        | yes    |                         |
| FA103   | 2                             | PDGFRA      | p.A466VfsTer39 | 0.0955               |        | yes    |                         |
| FA122   | 1                             | TP53        | p.R175H        | 7.2159               | yes    |        |                         |
| FA122   | 1                             | TP53        | p.R175H        | 33.7177              |        | yes    |                         |
| FA145   | 1                             | TP53        | p.V157I        | 0.0768               | yes    |        |                         |
| FA145   | 1                             | TP53        | p.W91L         | 0.0777               | yes    |        |                         |
| FA145   | 1                             | TP53        | p.P92A         | 0.0932               | yes    |        |                         |
| FA145   | 3                             | TP53        | p.V157I        | 0.0998               | yes    |        |                         |
| FA145   | 2                             | TP53        | p.V157I        | 0.1148               |        | yes    |                         |
| FA145   | 4                             | PDGFRA      | p.A466VfsTer39 | 0.2536               |        |        | yes                     |
| FA228   | 1                             | TP53        | p.P92A         | 0.0837               | yes    |        |                         |
| FA228   | 4                             | TP53        | p.T102P        | 0.2742               |        | yes    |                         |
| FA452   | 2                             | TP53        | p.W146SfsTer3  | 0.3911               | yes    |        |                         |
| FA452   | 2                             | TP53        | p.W146SfsTer3  | 0.8229               |        | yes    |                         |
| FA467   | 1                             | TP53        | p.Q38R         | 0.2323               |        | yes    |                         |
| FA531   | 2                             | TP53        | p.G245S        | 0.0726               | yes    |        |                         |
| FA531   | 2                             | IDH2        | p.R140Q        | 0.0758               | yes    |        |                         |
| FA531   | 3                             | TP53        | p.G245S        | 0.2911               | yes    |        |                         |
| FA531   | 4                             | IDH2        | p.R140Q        | 0.1121               |        |        | yes                     |
| FA536   | 4                             | TP53        | p.P92A         | 0.0928               | yes    |        |                         |
| FA536   | 4                             | TP53        | p.W91L         | 0.0986               | yes    |        |                         |

<sup>1</sup> MAF: molecular allele frequency<sup>2</sup> Used to discard possible mutations in saliva/plasma as originated in white blood cells upon clonal hematopoiesis
