# Supplementary material for: Early diagnosis of oral cancer and lesions in Fanconi anemia patients: a prospective and longitudinal study using saliva and plasma
Source: bioRxiv or medRxiv preprint supplement (doi:10.1101/2023.01.03.22284070), 2023-01-05
Supplement: Supplementary file [file media-4.pdf]

**Supplementary Table 5.** Lesions and SCC during follow-up of FA patients

| <b>Patient</b> | <b>Time order</b> | <b>Location</b>                   | <b>Oral Lesion</b>        | <b>Lesion grade</b>   |
|----------------|-------------------|-----------------------------------|---------------------------|-----------------------|
| FA145          | 1                 | retromolar trigone                | leuko/erythroplakia       | high grade displasia  |
|                | 3                 | retromolar trigone                | margin expansion from SCC | high grade displasia  |
| FA452          | 1                 | retromolar trigone                | leukoplakia               | no biopsy             |
| FA228          | 1                 | palatal mucosa                    | leukoplakia               | low grade displasia   |
|                | 1                 | buccal mucosa                     | leukoplakia               | low grade displasia   |
|                | 2                 | hard palate                       | leukoplakia               | hyperplasia           |
|                | 2                 | buccal mucosa                     | leuko/erythroplakia       | non dysplasia         |
|                | 3                 | right lip                         | ulcer                     | hyperplasia/dysplasia |
|                | 4                 | lip/oral mucosa                   | leukoplakia               | low grade displasia   |
|                | 5                 | vestibular fundus & tongue margin | leukoplakia               | hyperplasia           |
| FA103          | 1                 | tongue                            | leukoplakia               | no biopsy             |
| FA467          | 1                 | buccal mucosa                     | leukoplakia               | no biopsy             |
| FA374          | 1                 | alveolar ridge                    | leukoplakia               | no biopsy             |
| FA374          | 2                 | alveolar ridge & buccal mucosa    | leukoplakia               | no biopsy             |
| <b>Patient</b> | <b>Time order</b> | <b>Location</b>                   | <b>Oral Cancer</b>        | <b>Tumor stage</b>    |
| FA531          | 1                 | base of tongue                    | SCC                       | pT2N0Mx p16-          |
| FA145          | 2                 | retromolar trigone                | SCC                       | pT1NxMx p16-          |
