# Supplementary material for: Early diagnosis of oral cancer and lesions in Fanconi anemia patients: a prospective and longitudinal study using saliva and plasma
Source: bioRxiv or medRxiv preprint supplement (doi:10.1101/2023.01.03.22284070), 2023-01-05
Supplement: Supplementary file [file media-5.pdf]

**Supplementary Table 1.** Fanconi anemia patients' specific characteristics

| <b>Patient</b> | <b>Age<sup>1</sup></b> | <b>HSCT<sup>2</sup></b> |
|----------------|------------------------|-------------------------|
| FA122          | 26-30                  | no                      |
| FA531          | 26-30                  | no                      |
| FA82           | 46-50                  | no                      |
| FA103          | 26-30                  | yes                     |
| FA467          | 11-15                  | yes                     |
| FA452          | 16-20                  | yes                     |
| FA145          | 21-25                  | yes                     |
| FA536          | 16-20                  | yes                     |
| FA228          | 31-35                  | yes                     |
| FA294          | 36-40                  | yes                     |
| FA746          | 16-20                  | yes                     |
| FA29           | 26-30                  | no                      |
| FA328          | 16-20                  | yes                     |
| FS829          | 36-40                  | no                      |
| FA374          | 16-20                  | yes                     |
| FA49           | 26-30                  | yes                     |

<sup>1</sup> Age at patient recruitment

<sup>2</sup> HSCT: hematopoietic stem cell transplantation
